# Supplementary material
Source: PubMed Central journal article supplement (PMC6289302)

## ***BRAFV600E* in blood and brain and response to *BRAFV600E* inhibition suggest hematopoietic origin of neurodegeneration in LCH**

***Running Title: CNS LCH: Hematopoietic origin and targets for therapy***

Kenneth McClain et al.

### **SUPPLEMENTAL METHODS**

#### *RNA purification and cDNA amplification*

Total RNA was isolated normal brain, LCH lesions, LCH pituitary, LCH-ND brain, germinoma, and HLH samples according to the RNeasy FFPE Kit protocol (Qiagen, Valencia, CA). Complementary DNA (cDNA) amplification was performed with the Ovation FFPE WTA system, according to the manufacturer protocol (NuGen, San Carlos, CA).

#### *Quantitative real-time PCR*

Quantitative real-time PCR reactions were performed with standard methods. TaqMan Gene Expression Assays (Applied Biosystems, Foster City, CA). Single-stranded cDNA was generated by RNA amplification as described above. Each reaction included 20 ng cDNA. TaqMan Fast Universal PCR Master Mix (Applied Biosystems, Foster City, CA) was used in 25  $\mu$ l reactions in 96-well plates on a CFX96 Touch Real-time PCR detection system (Bio-Rad Laboratories, Hercules, CA). Assays were performed in triplicate. Thermal cycling conditions were set at 10 minutes at 95°C and then 40 cycles of 95°C for 15 seconds and 60°C for 1 minute.

TaqMan Probe Sets: (Applied Biosystems, Foster City, CA)

| <b>Gene Name</b>        | <b>TaqMan Probe</b> |
|-------------------------|---------------------|
| <i>GAPDH</i>            | Hs02758991_g1       |
| <i>CD3e</i>             | Hs01062241_m1       |
| <i>CD207 (langerin)</i> | Hs00210453_m1       |
| <i>CD1a</i>             | Hs00381754_g1       |
| <i>OPN</i>              | Hs00959008_g1       |

#### *Cellular BRAFV600E qPCR Assay with Peripheral Blood Mononuclear Cells*

Genomic DNA (gDNA) was isolated from frozen PBMC using the QIAamp DNA micro protocols (QIAGEN, Valencia, CA). Purified gDNA was used in the *BRAFV600E* qPCR mutation assay (Somatic Mutation Assay for *BRAF\_476*; Qiagen). *BRAF* mutation and reference primers were included in each reaction. Duplicate reactions were performed for each sample. All experiments were performed on a CFX96 Touch Real-time PCR detection system (Bio-Rad Laboratories). The means of  $C_t^{\text{mut}}$  and  $C_t^{\text{ref}}$  were calculated to determine  $\Delta C_t = C_t^{\text{mut(ave)}} - C_t^{\text{ref(ave)}}$ . The  $\Delta C_t$  was compared with a standard curve to estimate the percentage of cells with *BRAF-V600E* alleles. The standard curve was created by making 11 dilutions of gDNA isolated from A375 cell line (American Type Culture Collection (ATCC), Manassas, VA) with gDNA isolated from HEK293 cell line (ATCC). The  $\Delta C_t$  was plotted against the percentage of cells from A375/HEK293 cell pools (0.05%–100% *BRAFV600E*) from which the gDNA was isolated. For each LCH gDNA sample, the percentage of cells with the *BRAFV600E* mutation was then calculated based on the standard curve.

### *Extracellular BRAFV600E qPCR Assay with Cerebral Spinal Fluid*

Whole Genome Amplification (WGA) was performed directly on CSF samples from LCH patients using the REPLI-g Midi Kit (Qiagen) per manufacturer's instructions. qRT-PCR was performed as described above on the amplified product. *BRAFV600E*: wild-type standard curves were created for amplified gDNA from 11 dilutions of amplified gDNA from A375 cells with amplified gDNA from HEK293 cells. The amplified product was also tested by the QX100 Droplet Digital PCR (ddPCR™) system (Bio-Rad Laboratories) per manufacturer's instructions.

### *Immunohistochemistry*

FFPE tissue sections (3-5µm) were de-paraffinization and rehydration through a graded alcohol series, antigen retrieval was performed on FFPE slides using as indicated below. Endogenous peroxidase was blocked using 3% hydrogen peroxide for 10 minutes. Sections were incubated with primary antibodies at 4°C for overnight. Following incubation with secondary antibodies at room temperature for 1 hour, immunoreactivity were detected as outlined below. Slides were counter-stained with hematoxylin before imaged with Olympus BX53 microscope (10X/ 0.30 ∞/-/FN26.7, 20X / 0.50 ∞/0.17/FN26.5, 40X / 0.75 ∞/0.17/FN26.6) fitted with a DP26 camera.

| <b>Antibody (Source)</b> | <b>Cat#</b> | <b>Clone</b> | <b>Dilution</b> | <b>Antigen Retrieval</b>                    | <b>Detection</b>                           |
|--------------------------|-------------|--------------|-----------------|---------------------------------------------|--------------------------------------------|
| CD163 (Novocastra)       | CD163-L-CE  | 10D6         | 1:200           | uCC1 mild<br>(Ventana proprietary reagents) | iView DAB(Ventana proprietary reagents)    |
| CD33 (Leica)             | NCL-L-CD33  | PWS44        | 1:100           | uCC1 mild<br>(Ventana proprietary reagents) | OptiView DAB(Ventana proprietary reagents) |
| CD14 (abcam)             |             | 7            | 1:10            | uCC1 mild<br>(Ventana proprietary reagents) | OptiView DAB(Ventana proprietary reagents) |

|                                      |           |        |            |                                              |                                            |
|--------------------------------------|-----------|--------|------------|----------------------------------------------|--------------------------------------------|
| BRAF V600E (Ventana Medical Systems) | 790-4855  | VE1    | Pre-dilute | uCC1 standard (Ventana proprietary reagents) | OptiView DAB(Ventana proprietary reagents) |
| CD3 (Abcam)                          | ab699     | PS1    | 1:50       | Target Retrieval Solution (Dako)             | DAB(Innovex Biosciences)                   |
| CD207 (Santa Cruz Biotechnology)     | sc-33767  | N/A    | 1:50       | Target Retrieval Solution (Dako)             | DAB(Innovex Biosciences)                   |
| VE-1 (New East Biosciences)          | 26039     | N/A    | 1:50       | Target Retrieval Solution (Dako)             | DAB(Innovex Biosciences)                   |
| OPN (Santa Cruz Biotechnology)       | sc21742   | Akm2A1 | 1:50       | Target Retrieval Solution (Dako)             | DAB(Innovex Biosciences)                   |
| S100B (Millipore)                    | ABN59     | N/A    | 1:200      | Target Retrieval Solution (Dako)             | DAB(Innovex Biosciences)                   |
| MCP-1(Abcam)                         | ab9669    | N/A    | 1:50       | Target Retrieval Solution (Dako)             | DAB(Innovex Biosciences)                   |
| P2yp12 (Sigma)                       | HPA014518 | N/A    | 1:1000     | Target Retrieval Solution (Dako)             | NovaRED Vector Labs SK-4800                |

### *Immunoblot Analysis*

LCH and BT patient biopsy cell suspension were lysed in buffer containing 25 mM Tris-HCl pH 7.4, 150 mM NaCl, 1 mM EDTA, 1% NP-40 and 5% glycerol containing Halt protease inhibitor cocktail (Thermo SCIENTIFIC, Rockford, IL), phosphatase inhibitor cocktails 2 and 3 (Sigma-Aldrich, St Louis, MO) and 1 mM sodium orthovanadate (Sigma-Aldrich). Ten µg of whole cell lysates were resolved on a Criterion TGX 10% 4-20% (OPN) and Tris-Tricine 16%(S100B) gel (Bio-Rad, Hercules, CA), transferred to an Immobilon PVDF membrane (Millipore), and probed with antibodies recognizing OPN (sc21742, Santa Cruz Biotechnology, Dallas, TX) and S100B (ABN59, Millipore). The blots were subsequently stripped and re-probed with GAPDH antibody (Cell Signaling Technologies) to confirm equal loading.

## **SUPPLEMENTAL TABLES**

### **Supplemental Table 1. CSF analytes.**

### **Supplemental Table 2. Significant CSF biomarkers**

Table 3A. Significant CSF biomarkers: Discovery and validation - LCH vs BT and ALL

Table 3B. Significant CSF biomarkers: Full dataset - LCH vs HLH

Table 3C. Significant CSF biomarkers: Full dataset - LCH subjects with CNS tumor vs BT

Table 3D. Significant CSF biomarkers: Full dataset – LCH-ND vs Non-LCH-ND

### **Supplemental Table 3. Identification of *BRAFV600E* in peripheral blood fractions of subjects with LCH CNS lesions**

### **Supplemental Table 4. Clinical courses of patients treated with *BRAFV600E* inhibition.**

Radiologic and clinical responses are reported as complete response (CR), partial response (PR), stable disease (SD), or progressive disease (PD). Radiologic response is reported as both interval change from previous study as well as cumulative change relative to initiation of MAPK inhibitor therapy. Clinical response is reported as interval change and objectively measured using the ataxia rating score. Intrathecal methotrexate/hydrocortisone (IT MTX/HCT). (A) LCH0008. (B) LCH0035. (C) LCH0060. (D) LCH0004.

## SUPPLEMENTAL FIGURES

### Supplemental Figure 1. Study patients and samples

- A.** Venn diagram identifies the inclusion of subjects across the different experiments in this study. “CSF” indicates CSF proteomics and CSF extracellular BRAF-V600E genomic DNA qPCR testing. “PBMC Blood (Pre/post-chemotherapy)” indicates PBMC from blood specimens were used for cellular genomic DNA qPCR testing at various timepoints relative to chemotherapy. “PBMC Blood (BRAFi therapy)” indicates PBMC from blood specimens were used for cellular genomic DNA qPCR testing at various timepoints relative to BRAF inhibitor therapy. “Biopsy” indicates subjects with biopsy specimens used in this study.
- B.** Flow-chart of CSF specimens in proteomics studies, BRAF-V600E qPCR studies, or both. For CSF studies, 1 CSF specimen was used for each subject.
- C.** Flow-chart of patients and PBMC specimens used in BRAF-V600E qPCR studies. (P) indicates the number of patients. (S) indicates the number of samples. The “Treatment” column is color coded with respect to the Figure in which the results from the specimens are illustrated. Venn diagram indicates the PBMC sample groups (pre-chemotherapy; post-chemotherapy with systemic disease; post-chemotherapy without systemic disease) to which subjects contributed specimens.

### Supplemental Figure 2. Serial analysis of *BRAFV600E* allele in PBMC.

Evaluation for *BRAFV600E* allele in PBMC in LCH-ND patients across serial blood specimens in patients with proven *BRAFV600E*<sup>+</sup> lesions and/or detectable *BRAFV600E*<sup>+</sup> in PBMC at any point. Datapoints describe radiologic and clinical details of LCH-ND

along with treatment details over time (years on x-axis) where PMBC were evaluated for *BRAFV600E* (% on y-axis).

Supplemental Table 1: Detailed Analyte Information

| Millipore Kit                           | Catalog Number   | Dilution Factor | Analytes                                                                                                                                                                                                                                                                                                                                                                       |
|-----------------------------------------|------------------|-----------------|--------------------------------------------------------------------------------------------------------------------------------------------------------------------------------------------------------------------------------------------------------------------------------------------------------------------------------------------------------------------------------|
| Human Cytokine/Chemokine I              | HCYTMAG-60K-PX38 | 1:2             | EGF, FGF-2, Eotaxin, TGF- $\alpha$ , G-CSF, Flt-3L, GM-CSF, Fractalkine, IFN- $\alpha$ 2, INF- $\gamma$ , GRO, IL-10, MCP-3, IL-12p40, MDC, IL-12p70, IL-13, IL-15, SCD40-L, IL-17, IL-1RA, sIL-2RA, IL-1 $\alpha$ , IL-9, IL-1 $\beta$ , IL-2, IL-3, IL-4, IL-5, IL-6 (2), IL-7, IL-8 (2), IP-10, MCP-1, MIP-1 $\alpha$ , MIP-1 $\beta$ , TNF- $\alpha$ , TNF- $\beta$ , VEGF |
| Human Cytokine/Chemokine Panel II       | HCP2MAG-62K-PX23 | 1:2             | Eotaxin-2, MCP-2, BCA-1, MCP-4, I-309, IL-16, TARC, 6CKine, Eotaxin-3, LIF, TPO, SCF (2), TSLP, IL-33, IL-20, IL-21, IL-23, TRAIL (2), CTACK, SDF-1 $\alpha$ + $\beta$ , ENA-78, MIP-1 $\alpha$ , IL-28A                                                                                                                                                                       |
| Human Cytokine/Chemokine Panel III      | HCYP3MAG-63K     | 1:2             | CXCL6/GCP-2, CXCL11/I-TAC, CCL19/MIP-3 $\beta$ , CCL20/MIP-3 $\alpha$ , XCL1/Lymphotactin, IL-11, IL-29/IFN- $\gamma$ 1, CXCL9/MIG, M-CSF                                                                                                                                                                                                                                      |
| Human Circulating Cancer Panel 1        | HCCBP1MAG-58K    | 1:2             | AFP, Total PSA, CA15-3, CA19-9, MIF, TRAIL, Leptin, Free PSA, IL-6, sFasL, CEA, CA125, IL-8, HGF, SDF1 $\alpha$ + $\beta$ , sFas, TNF- $\alpha$ (2), Prolactin, SCF, CYFRA 21-1, OPN, FGF-2 (2), $\beta$ -HCG, HE4, TGF- $\alpha$ (2), VEGF (2)                                                                                                                                |
| Human Neurodegenerative Disease Panel 1 | HNDG1MAG-36K     | 1:400           | Apolipoprotein AI, Apolipoprotein CIII, Apolipoprotein E, Complement C3, $\alpha$ 2-Macroglobulin, Prealbumin,                                                                                                                                                                                                                                                                 |
| Human Neurodegenerative Disease Panel 2 | HNDG2MAG-36K     | 1:20            | Complement Factor H                                                                                                                                                                                                                                                                                                                                                            |
| Human Neurodegenerative Disease Panel 3 | HNDG3MAG-36K     | Neat            | CRP, $\alpha$ 1-Antitrypsin, PEDF, SAP, MIP-4, Complement C4                                                                                                                                                                                                                                                                                                                   |
| Human Neurodegenerative Disease Panel 4 | HNDG4MAG-36K     | 1:3             | BDNF, sVCAM-1, sICAM-1, MPO, Cathepsin D, PDGF-AA, PDGF-AB/BB, RANTES, PAI-1 (Total), NCAM                                                                                                                                                                                                                                                                                     |
|                                         |                  |                 | S100B, Ab40, Ab42, GDNF, sRAGE                                                                                                                                                                                                                                                                                                                                                 |



Supplemental Table 2

A. CSF Biomarkers: Discovery and Validation (LCH vs. ALL vs. BT)

|            | Analytes | Log Transformed Mean Concentration (pg/ml) ( $\pm 2$ SD) |                |                | p-value  | LCH vs. ALL |             | LCH vs. BT |             |
|------------|----------|----------------------------------------------------------|----------------|----------------|----------|-------------|-------------|------------|-------------|
|            |          | LCH                                                      | ALL            | BT             |          | p-value     | Significant | p-value    | Significant |
| Discovery  | S100B    | 9.3 $\pm$ 0.7                                            | 9.0 $\pm$ 0.9  | 11.2 $\pm$ 1.9 | 8.65E-05 | 3.26E-01    | No          | 4.00E-03   | Yes         |
|            | OPN      | 17.0 $\pm$ 1.3                                           | 15.6 $\pm$ 0.8 | 14.9 $\pm$ 1.5 | 1.98E-04 | 2.54E-03    | Yes         | 5.90E-04   | Yes         |
| Validation | S100B    | 8.9 $\pm$ 0.8                                            | 8.8 $\pm$ 0.7  | 10.9 $\pm$ 1.5 | 9.20E-06 | 9.09E-01    | No          | 8.33E-04   | Yes         |
|            | OPN      | 17.9 $\pm$ 1.2                                           | 15.6 $\pm$ 0.9 | 15.5 $\pm$ 1.9 | 3.59E-05 | 9.96E-06    | Yes         | 1.17E-03   | Yes         |

B. CSF Biomarkers: Full Dataset (LCH vs. HLH)

| Analytes        | Log Transformed Mean Concentration (pg/ml) ( $\pm 2$ SD) |                | Log Fold Change | Fold Change | p-value  |
|-----------------|----------------------------------------------------------|----------------|-----------------|-------------|----------|
|                 | LCH                                                      | HLH            |                 |             |          |
| <b>OPN</b>      | 17.0 $\pm$ 1.4                                           | 15.3 $\pm$ 1.4 | 1.69            | 3.23        | 1.77E-03 |
| IL-12 (p40)     | 2.3 $\pm$ 0.5                                            | 2.9 $\pm$ 0.7  | -0.56           | 0.68        | 9.57E-03 |
| Fractalkine     | 6.9 $\pm$ 0.6                                            | 7.5 $\pm$ 1.0  | -0.64           | 0.64        | 1.22E-02 |
| IL-1RA          | 2.9 $\pm$ 0.5                                            | 3.5 $\pm$ 0.9  | -0.66           | 0.63        | 4.04E-03 |
| IL-7            | 2.1 $\pm$ 0.6                                            | 2.8 $\pm$ 0.6  | -0.69           | 0.62        | 2.08E-03 |
| IFN- $\alpha$ 2 | 3.0 $\pm$ 0.6                                            | 3.8 $\pm$ 0.9  | -0.79           | 0.58        | 1.94E-03 |
| IL-1a           | 2.0 $\pm$ 0.6                                            | 2.9 $\pm$ 1.2  | -0.93           | 0.53        | 1.32E-03 |
| IL-8            | 5.1 $\pm$ 0.8                                            | 6.1 $\pm$ 1.3  | -1.08           | 0.47        | 1.74E-03 |
| PAI-1 (total)   | 9.1 $\pm$ 0.6                                            | 10.1 $\pm$ 1.2 | -1.09           | 0.47        | 2.05E-04 |
| IL-8 (2)        | 4.3 $\pm$ 0.8                                            | 5.5 $\pm$ 1.2  | -1.20           | 0.43        | 4.45E-04 |
| GRO             | 4.1 $\pm$ 0.8                                            | 5.4 $\pm$ 1.5  | -1.27           | 0.41        | 5.19E-04 |
| BCA-1           | 1.1 $\pm$ 0.6                                            | 2.6 $\pm$ 2.5  | -1.54           | 0.34        | 8.42E-04 |
| IL-10           | 1.7 $\pm$ 0.5                                            | 3.3 $\pm$ 2.2  | -1.57           | 0.34        | 1.38E-04 |
| RANTES          | 1.7 $\pm$ 1.1                                            | 3.5 $\pm$ 2.1  | -1.72           | 0.30        | 1.23E-03 |
| G-CSF           | 4.2 $\pm$ 1.2                                            | 6.4 $\pm$ 1.2  | -2.18           | 0.22        | 1.00E-05 |
| CXCL11/I-TAC    | 2.4 $\pm$ 0.6                                            | 4.9 $\pm$ 2.1  | -2.43           | 0.19        | 1.00E-07 |
| IP-10           | 8.9 $\pm$ 1.4                                            | 11.6 $\pm$ 2.8 | -2.64           | 0.16        | 1.30E-04 |
| CRP             | 13.2 $\pm$ 3.5                                           | 17.0 $\pm$ 2.5 | -3.89           | 0.07        | 2.63E-03 |

C. CSF Biomarkers: Full Dataset (LCH (CNS Tumor) vs. BT)

| Analytes | Log Transformed Mean Concentration (pg/ml) ( $\pm 2$ SD) |                | Log Fold Change | Fold Change | p-value  |
|----------|----------------------------------------------------------|----------------|-----------------|-------------|----------|
|          | LCH (CNS Tumor)                                          | BT             |                 |             |          |
| OPN      | 16.7 $\pm$ 1.3                                           | 15.2 $\pm$ 1.7 | 1.55            | 2.94        | 9.49E-04 |
| S100B    | 9.5 $\pm$ 0.8                                            | 11.1 $\pm$ 1.7 | -1.52           | 0.35        | 2.93E-04 |

D. CSF Biomarkers: Full Dataset (LCH (ND+) vs. ND CTL)

| Analytes | Log Transformed Mean Concentration (pg/ml) ( $\pm 2$ SD) |                | Log Fold Change | Fold Change | p-value  |
|----------|----------------------------------------------------------|----------------|-----------------|-------------|----------|
|          | LCH (ND+)                                                | ND CTL         |                 |             |          |
| OPN      | 17.5 $\pm$ 1.3                                           | 16.0 $\pm$ 1.3 | 1.44            | 2.71        | 2.58E-05 |
| S100B    | 9.0 $\pm$ 0.8                                            | 9.9 $\pm$ 0.9  | -0.86           | 0.55        | 8.60E-05 |

Supplemental Table 3: Identification of *BRAF*V600E in peripheral blood fractions of subjects with LCH CNS lesions

| Sample  | Total Events | %Viability | Sort Purity | T-Cells<br>CD3 | B-Cells<br>CD19 | Macs<br>CD64 | Mono/NK<br>CD16 | DC Precursor<br>CD11c | Myeloid DC<br>CD11c + CD14 | Lin+ DR-    | Negative Fraction<br>CD11c-ve CD14-ve |
|---------|--------------|------------|-------------|----------------|-----------------|--------------|-----------------|-----------------------|----------------------------|-------------|---------------------------------------|
| LCH0001 | 71000        | 89%        | >85%        | -              | -               | -            | <b>0.79</b>     | <b>0.05</b>           | -                          | -           | -                                     |
| LCH0004 | 62000        | 82%        | >85%        | <b>0.08</b>    | -               | -            | -               | -                     | -                          | <b>0.58</b> | -                                     |
| LCH0016 | 63000        | 82%        | >85%        | <b>0.70</b>    | -               | -            | -               | -                     | -                          | <b>0.14</b> | -                                     |
| LCH0021 | 54000        | 80%        | >85%        | <b>0.09</b>    | -               | <b>0.07</b>  | <b>0.18</b>     | -                     | <b>0.12</b>                | -           | -                                     |
| LCH0034 | 62000        | 80%        | >85%        | -              | -               | -            | <b>0.82</b>     | -                     | -                          | -           | -                                     |
| LCH0035 | 74000        | 84%        | >85%        | -              | -               | -            | -               | -                     | <b>0.09</b>                | -           | -                                     |
| LCH0040 | 72000        | 81%        | >85%        | -              | -               | <b>0.46</b>  | <b>0.55</b>     | <b>0.78</b>           | <b>1.33</b>                | -           | -                                     |
| LCH0044 | 61000        | 87%        | >85%        | -              | -               | -            | -               | -                     | <b>0.05</b>                | -           | -                                     |
| LCH0061 | 81000        | 87%        | >85%        | -              | -               | -            | -               | -                     | -                          | -           | -                                     |
| LCH0063 | 60000        | 82%        | >85%        | -              | -               | -            | <b>0.07</b>     | -                     | <b>0.02</b>                | -           | -                                     |

## Supplemental Table 4

A. Clinical Response Form: LCH0008

| Start   | End     | Clinical Event                                                                                                                                                                                                                                                           | Sites of Lesions                                 | ND           | Therapy                                                                  | Response Lesion      | Response ND (MRI) - Interval | Response ND (MRI) - Cumulative | Response ND (clinical) - Interval | ARS             | PBMC BRAFV600E (%) |
|---------|---------|--------------------------------------------------------------------------------------------------------------------------------------------------------------------------------------------------------------------------------------------------------------------------|--------------------------------------------------|--------------|--------------------------------------------------------------------------|----------------------|------------------------------|--------------------------------|-----------------------------------|-----------------|--------------------|
| 4/2014  | 10/2014 | <ul style="list-style-type: none"> <li>New diagnosis</li> </ul>                                                                                                                                                                                                          | Scalp and diaper rash, colon, bone marrow, liver | No           | clofarabine, methylprednisolone,                                         | CR                   | NA                           | NA                             | NA                                | 0-0             | NA                 |
| 10/2014 | 9/2015  | <ul style="list-style-type: none"> <li>Transition to maintenance therapy</li> </ul>                                                                                                                                                                                      | None                                             | No           | mercaptopurine methotrexate (PO)                                         | CR                   | NA                           | NA                             | NA                                | 0-0             | NA                 |
| 11/2015 | 12/2015 | <ul style="list-style-type: none"> <li>Pneumonia</li> <li>Thrombocytopenia</li> <li>Splenomegaly</li> </ul>                                                                                                                                                              | None                                             | No           | antibiotics and supportive care                                          | CR                   | NA                           | NA                             | NA                                | 0-0             | NA                 |
| 12/2015 | 1/2016  | <ul style="list-style-type: none"> <li>Relapse #1</li> <li>Diagnosis of HLH</li> </ul>                                                                                                                                                                                   | Spleen, liver, bone marrow                       | No           | rituximab, methylprednisolone                                            | PR (HLH)<br>PD (LCH) | NA                           | NA                             | NA                                | 0-0             | NA                 |
| 1/2016  | 2/2016  | <ul style="list-style-type: none"> <li>Splenomegaly with refractory</li> <li>Thrombocytopenia</li> <li>LCH-associated HLH</li> <li>Abnormal behavior</li> </ul>                                                                                                          | Spleen, liver, bone marrow, CSF, CNS             | CT Clinical  | splenectomy<br><u>HLH-directed therapy</u><br>etoposide<br>dexamethasone | SD (HLH)<br>PD (LCH) | NA                           | NA                             | PD                                | 26/47-<br>42/42 | 12.9               |
| 2/2016  | 3/2016  | <ul style="list-style-type: none"> <li>Seizure</li> <li>Somnolent</li> <li>Abnormal behavior</li> <li>Decreased strength</li> <li>Worsening ataxia</li> <li>Intellectual decline</li> <li>Speech regressed</li> <li>Disseminated fungal infection</li> </ul>             | Brain, CSF, liver, bone marrow                   | MRI Clinical | cytarabine, cladribine                                                   | PR                   | PD                           | NA                             | PD                                | 42/45           | 0.08               |
| 3/2016  | 5/2016  | <ul style="list-style-type: none"> <li>Started dabrafenib</li> <li>Improved strength</li> <li>Improved speech</li> <li>Improved behavior</li> <li>Intellectual decline resolved</li> <li>Decreased ataxia</li> </ul>                                                     | Brain, CNS, bone marrow, liver                   | MRI Clinical | dabrafenib<br>25 mg BID<br>(96 mg/m <sup>2</sup> /day)                   | PR                   | PD                           | PD                             | PR                                | 30-<br>42/47    | 0.11               |
| 5/2016  | 6/2016  | <ul style="list-style-type: none"> <li>Improved strength</li> <li>Improved speech</li> <li>Improved behavior</li> <li>Slightly worsened ARS (due to unrelated fall w/ femur fracture)</li> <li>Sitting normally, unassisted</li> <li>Improving liver function</li> </ul> | Brain, CSF, liver, bone marrow                   | MRI Clinical | dabrafenib                                                               | PR                   | PR                           | PR                             | PR                                | 29/55           | 0.99               |
| 6/2016  | 7/2017  | <ul style="list-style-type: none"> <li>Neurologic symptoms resolved</li> </ul>                                                                                                                                                                                           | None                                             | MRI          | dabrafenib                                                               | CR                   | SD                           | PR                             | CR                                | 0               | 0.83               |

**Radiologic Response (Corresponding to Figure 5)**

Initially, there is moderate hyperintense FLAIR signal in bilateral dentate and peridentate regions, dorsal pons, bilateral putamen, globus pallidi, bilateral paramedian thalami and mesial temporal regions. Two years later, there has been interval progression of the neurodegenerative disease on MR with increased hyperintense FLAIR signal and extent of the involvement in the aforementioned areas as well as new development of signal abnormality in bilateral cerebellum white matter centrally. At 15-month follow-up after the treatment with BRAF inhibitor, there is significant improvement of signal abnormality in the bilateral cerebellum, mesial temporal lobes, basal ganglia and thalami.

## Supplemental Table 4

B. Clinical Response Form: LCH0035

| Start   | End     | Clinical Event                                                                                                            | Sites of Lesions                              | ND              | Therapy                                                                                                                                  | Response Lesion | Response ND (MRI) - Interval | Response ND (MRI) - Cumulative | Response ND (clinical) - Interval | ARS   | PBMC BRAFV600E (%) |
|---------|---------|---------------------------------------------------------------------------------------------------------------------------|-----------------------------------------------|-----------------|------------------------------------------------------------------------------------------------------------------------------------------|-----------------|------------------------------|--------------------------------|-----------------------------------|-------|--------------------|
| 1/2007  | 3/2008  | • New diagnosis                                                                                                           | Scalp rash<br>Temporal bone                   | No              | vinblastine<br>prednisone                                                                                                                | CR              | NA                           | NA                             | NA                                | 0-0   | NA                 |
| 12/2008 | 1/2009  | • Diabetes insipidus                                                                                                      | Pituitary                                     | MRI             | None                                                                                                                                     | SD              | PD                           | NA                             | NA                                | 0-0   | NA                 |
| 1/2009  | 11/2012 | • Relapse#1                                                                                                               | Parietal                                      | MRI             | curettage                                                                                                                                | CR              | SD                           | NA                             | NA                                | 0-0   | 0-0.017            |
| 11/2012 | 7/2013  | • Relapse#2                                                                                                               | Mandible                                      | MRI             | cytarabine<br>cladribine                                                                                                                 | CR              | SD                           | NA                             | NA                                | 0-0   | 0.018-0.04         |
| 8/2013  | 9/2013  | • Onset of clinical ND                                                                                                    | None                                          | MRI<br>Clinical | None                                                                                                                                     | CR              | PD                           | NA                             | PD                                | 0-16  | NA                 |
| 9/2013  | 12/2013 | • Relapse #3<br>• Worsening ataxia                                                                                        | Spinal cord                                   | MRI<br>Clinical | clofarabine<br>IT MTX/HCT<br>dexamethasone                                                                                               | PD              | PD                           | NA                             | PD                                | 16-90 | 0-0.015            |
| 12/2013 | 2/2014  | • Wheelchair bound<br>• Worsening ataxia<br>• Intellectual decline                                                        | Same                                          | MRI<br>Clinical | clofarabine<br>IT MTX/HCT<br>dexamethasone                                                                                               | PD              | PD                           | NA                             | PD                                | 90-94 | 0                  |
| 2/2014  | 4/2014  | • Improved strength and coordination                                                                                      | Same                                          | MRI<br>Clinical | clofarabine<br>IT MTX/HCT<br>dexamethasone                                                                                               | SD              | PR                           | NA                             | PR                                | 94-90 | 0                  |
| 4/2014  | 7/2014  | • Improved strength<br>• Ataxia unchanged                                                                                 | Same                                          | MRI<br>Clinical | vemurafenib<br>480 mg BID<br>(807 mg/m <sup>2</sup> /day)                                                                                | PR              | PD                           | PD                             | PD                                | 90-88 | 0                  |
| 7/2014  | 11/2014 | • Improved speech<br>• Improved bladder function<br>• Regained ability to sit                                             | Spinal cord normal<br>Brain slightly improved | MRI<br>Clinical | vemurafenib<br>720 mg BID<br>(1083 mg/m <sup>2</sup> /day)                                                                               | PR              | PR                           | PR                             | NA                                | 88-80 | 0                  |
| 11/2014 | 12/2014 | • No change                                                                                                               | Same                                          | MRI<br>Clinical | vemurafenib<br>rituximab                                                                                                                 | SD              | NA                           | PR                             | SD                                | 80-80 | 0                  |
| 12/2014 | 4/2015  | • Improved strength<br>• Improved speech<br>• Decreased ataxia                                                            | Same                                          | MRI<br>Clinical | vemurafenib                                                                                                                              | SD              | PR                           | PR                             | PR                                | 80-75 | 0                  |
| 4/2015  | 7/2015  | • Uveitis<br>• Declining strength<br>• Abnormal behavior                                                                  | Same                                          | MRI<br>Clinical | discontinued<br>vemurafenib                                                                                                              | PR              | NA                           | PR                             | PD                                | 75-80 | 0                  |
| 7/2015  | 1/2016  | • Improved strength<br>• Improved speech<br>• Decreased ataxia                                                            | Spinal cord resolved<br>CNS persists          | MRI<br>Clinical | restart vemurafenib<br>240 mg BID<br>(343 mg/m <sup>2</sup> /day)<br>increased to 480 mg<br>AM/240 mg PM (518<br>mg/m <sup>2</sup> /day) | CR              | NA                           | PR                             | PR                                | 80-58 | 0                  |
| 1/2016  | 7/2017  | • Improved strength<br>• Improved speech<br>• Decreased ataxia<br>• Hip surgery for avascular necrosis – wheelchair bound | Same                                          | MRI<br>Clinical | hydroxyurea                                                                                                                              | CR              | SD                           | PR                             | PR                                | 50-43 | 0                  |

**Radiologic Response (Corresponding to Figure 5)**

Initially, there is moderate hyperintense FLAIR signal in bilateral dentate and peridentate regions, dorsal pons, bilateral putamen, globus pallidi, bilateral paramedian thalami and mesial temporal regions. Two years later, there has been interval progression of the neurodegenerative disease on MR with increased hyperintense FLAIR signal and extent of the involvement in the aforementioned areas as well as new development of signal abnormality in bilateral cerebellum white matter centrally. At 15-month follow-up after the treatment with BRAF inhibitor, there is significant improvement of signal abnormality in the bilateral cerebellum, mesial temporal lobes, basal ganglia and thalami.

## Supplemental Table 4

C. Clinical Response Form: LCH0060

| Start   | End     | Clinical Event                                                | Sites of Lesions | ND           | Therapy                                                      | Response Lesion | Response ND (MRI) - Interval | Response ND (MRI) - Cumulative | Response ND (clinical) - Interval | ARS   | PBMC BRAFV600E (%)  |
|---------|---------|---------------------------------------------------------------|------------------|--------------|--------------------------------------------------------------|-----------------|------------------------------|--------------------------------|-----------------------------------|-------|---------------------|
| 1/2005  | 1/2008  | • New diagnosis                                               | Humerus          | No           | curettage                                                    | CR              | NA                           | NA                             | NA                                | 0-0   | NA                  |
| 1/2008  | 1/2011  | • Relapse #1                                                  | Tibia            | No           | curettage                                                    | CR              | NA                           | NA                             | NA                                | 0-0   | NA                  |
| 1/2011  | 10/2012 | • Ataxia, learning problems, emotional lability               | None             | Clinical     | None                                                         | CR              | NA                           | NA                             | PD                                | 10-14 | NA                  |
| 10/2012 | 12/2013 | • Improved neurologic symptoms                                | None             | MRI Clinical | cytarabine                                                   | CR              | PR                           | NA                             | PR                                | 14-8  | 0-0.013             |
| 6/2014  | 12/2014 | • Worsening neurologic symptoms                               | None             | MRI Clinical | off treatment 6 months                                       | CR              | PD                           | NA                             | PD                                | 8-16  | 0                   |
| 1/2015  | 7/2015  | • Hydrocephalus, ataxia worse                                 | None             | MRI Clinical | cytarabine                                                   | CR              | PD                           | NA                             | PD                                | 16-20 | 0                   |
| 8/2015  | 10/2015 | • Stable neurologic symptoms                                  | None             | MRI Clinical | vemurafenib 240 mg AM/360 mg PM (536 mg/m <sup>2</sup> /day) | CR              | PR                           | PR                             | SD                                | 20-20 | Detectable (<0.01%) |
| 10/2015 | 3/2016  | • Improved speech and balance                                 | None             | MRI Clinical | vemurafenib                                                  | CR              | PR                           | PR                             | PR                                | 20-9  | 0.01                |
| 3/2016  | 5/2017  | • Speech and ataxia worse<br>• Not compliant with medications | None             | MRI Clinical | vemurafenib                                                  | CR              | SD                           | PR                             | PD                                | 19-29 | 0                   |

**Radiologic Response (Corresponding to Figure 5)**

Initially, there is mild hyperintense FLAIR signal in bilateral posterior centrum semiovale and bilateral central cerebellar white matter. There has been worsening of signal abnormality in bilateral cerebellum on the follow up 4 years later. After 8-months of treatment with BRAF inhibitor, there is significant improvement of signal abnormality in the bilateral cerebellum.

## Supplemental Table 4

D. Clinical Response Form: LCH0004

| Start   | End     | Clinical Event                                                                                                                  | Sites of Lesions                      | ND           | Therapy                                                                                                         | Response Lesion | Response ND (MRI) - Interval | Response ND (MRI) - Cumulative | Response ND (clinical) - Interval | ARS   | PBMC BRAFV600 E (%) |
|---------|---------|---------------------------------------------------------------------------------------------------------------------------------|---------------------------------------|--------------|-----------------------------------------------------------------------------------------------------------------|-----------------|------------------------------|--------------------------------|-----------------------------------|-------|---------------------|
| 1/1997  | 1/1998  | • Presentation of LCH                                                                                                           | Lung, skin, intestine, femur, occiput | No           | vinblastine, prednisone, methotrexate                                                                           | CR              | NA                           | NA                             | NA                                | 0-0   | NA                  |
| 1/1999  | 1/2002  | • Relapse #1                                                                                                                    | Frontal skull                         | No           | vinblastine, prednisone                                                                                         | CR              | NA                           | NA                             | NA                                | 0-0   | NA                  |
| 10/2003 | 6/2005  | • Relapse #2<br>• Ataxia, dysarthria, dysmetria                                                                                 | None                                  | MRI Clinical | None                                                                                                            | CR              | NA                           | NA                             | NA                                | 0-4   | NA                  |
| 7/2005  | 3/2006  | • Worsening neurologic symptoms                                                                                                 | None                                  | MRI Clinical | Vincristine<br>cytarabine                                                                                       | CR              | SD                           | NA                             | PD                                | 28-32 | NA                  |
| 7/2006  | 6/2007  | • Worsening neurologic symptoms                                                                                                 | None                                  | MRI Clinical | IVIG                                                                                                            | CR              | SD                           | NA                             | PD                                | 32-60 | 0.12-0.05           |
| 7/2007  | 1/2008  | • Worsening neurologic symptoms                                                                                                 | None                                  | MRI Clinical | sirolimus, IVIG                                                                                                 | CR              | PR                           | NA                             | SD                                | 74-68 | NA                  |
| 3/2008  | 10/2008 | • Hydrocephalus<br>• Worsening neurologic symptoms                                                                              | None                                  | MRI Clinical | ventriculoperitoneal shunt                                                                                      | CR              | SD                           | NA                             | PR                                | 68    | NA                  |
| 8/2009  | 7/2010  | • Ataxia, speech improved                                                                                                       | None                                  | MRI Clinical | imatinib, sirolimus, IVIG                                                                                       | CR              | PR                           | NA                             | PR                                | 68-55 | 0.03                |
| 8/2010  | 12/2011 | • Worse ataxia, inappropriate behavior, confined to wheel chair                                                                 | None                                  | MRI Clinical | imatinib, sirolimus, IVIG                                                                                       | CR              | PD                           | NA                             | PD                                | 55-80 | NA                  |
| 1/2012  | 5/2013  | • Dysphagia, speech and spasticity worse                                                                                        | None                                  | MRI Clinical | imatinib, sirolimus, IVIG                                                                                       | CR              | SD                           | NA                             | PD                                | 80-90 | 0.08                |
| 6/2013  | 3/2015  | • Speech, swallowing, spasticity better                                                                                         | None                                  | MRI Clinical | rituximab, sirolimus, IVIG                                                                                      | CR              | PD                           | NA                             | PR                                | 90-85 | 0.12-0.24           |
| 6/2015  | 7/2015  | • Trial of vemurafenib initiated                                                                                                | None                                  | MRI Clinical | vemurafenib 480 mg BID (545 mg/m <sup>2</sup> /day), sirolimus, IVIG                                            | CR              | SD                           | SD                             | SD                                | 85-85 | NA                  |
| 7/2015  | 8/2015  | • Joint pain, rash                                                                                                              | None                                  | MRI Clinical | discontinued vemurafenib                                                                                        | CR              | PD                           | PD                             | PD                                | 85-92 | 0.03-0.06           |
| 8/2015  | 2/2016  | • Speech, choking, tremors and spasticity worsen<br>• Reaction to rituximab                                                     | None                                  | MRI Clinical | rituximab, hydroxyurea                                                                                          | CR              | NA                           | PD                             | PD                                | 92-95 | 0.03-0.24           |
| 2/2016  | 3/2016  | • Worsening neurologic symptoms                                                                                                 | None                                  | MRI Clinical | hydroxyurea                                                                                                     | CR              | NA                           | PD                             | PD                                | 95-96 | 0.04                |
| 3/2016  | 1/2017  | • Rituximab increased to 555 mg/m <sup>2</sup><br>• Modest improvement in speech<br>• Decreased choking<br>• Increased strength | None                                  | MRI Clinical | dabrafenib 100 mg BID (118 mg/m <sup>2</sup> /day), rituximab                                                   | CR              | PD                           | PD                             | SD                                | 96-93 | 0.04-0.11           |
| 1/2017  | 3/2017  | • Rash<br>• Ptosis and periorbital swelling<br>• Dabrafenib stopped<br>• Worsened neurologic symptoms                           | None                                  | MRI Clinical | rituximab                                                                                                       | CR              | SD                           | PD                             | PD                                | 93-96 | 0.18                |
| 3/2017  | 5/2017  | • Speech, choking, tremors and spasticity stable<br>• Rituximab reaction                                                        | None                                  | MRI Clinical | dabrafenib 75 mg BID (87 mg/m <sup>2</sup> /day), trametinib 2 mg daily (1.2 mg/m <sup>2</sup> /day), rituximab | CR              | PD                           | PD                             | SD                                | 93-92 | 0.34                |
| 5/2017  | 7/2017  | • Folliculitis<br>• Choking improved<br>• Speech worse                                                                          | None                                  | MRI Clinical | dabrafenib, trametinib, obinutuzumab                                                                            | CR              | NA                           | PD                             | PD                                | 92-94 | NA                  |

**Radiologic Response (Corresponding to Figure 5)**

There is persistent hyperintense FLAIR signal in the bilateral dentate, peridentate regions, bilateral central white matter of the cerebellum and periventricular white matter after 10 years follow-up. Borderline volume loss in bilateral basal ganglia is also noted. Twenty-five months following BRAF inhibitor treatment, there is subtle progression of the signal abnormality in the bilateral cerebellum and increased mineralization of the globus pallidus.

Supplemental Figure 1.

A.

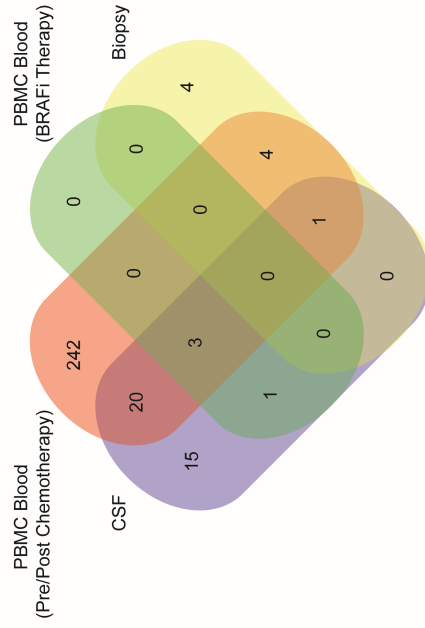

B.

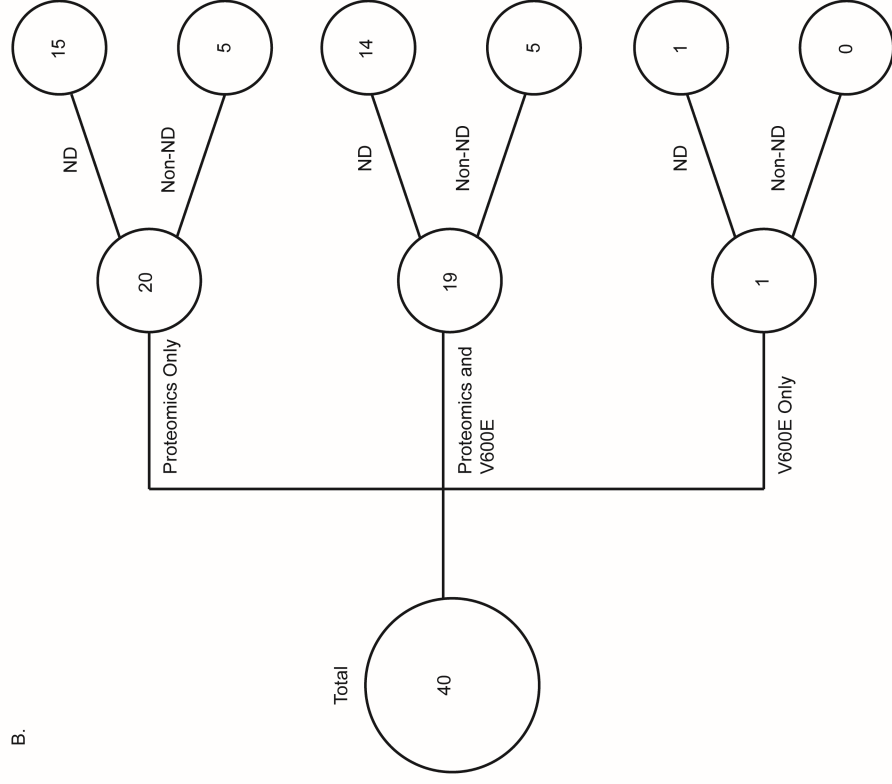

C.

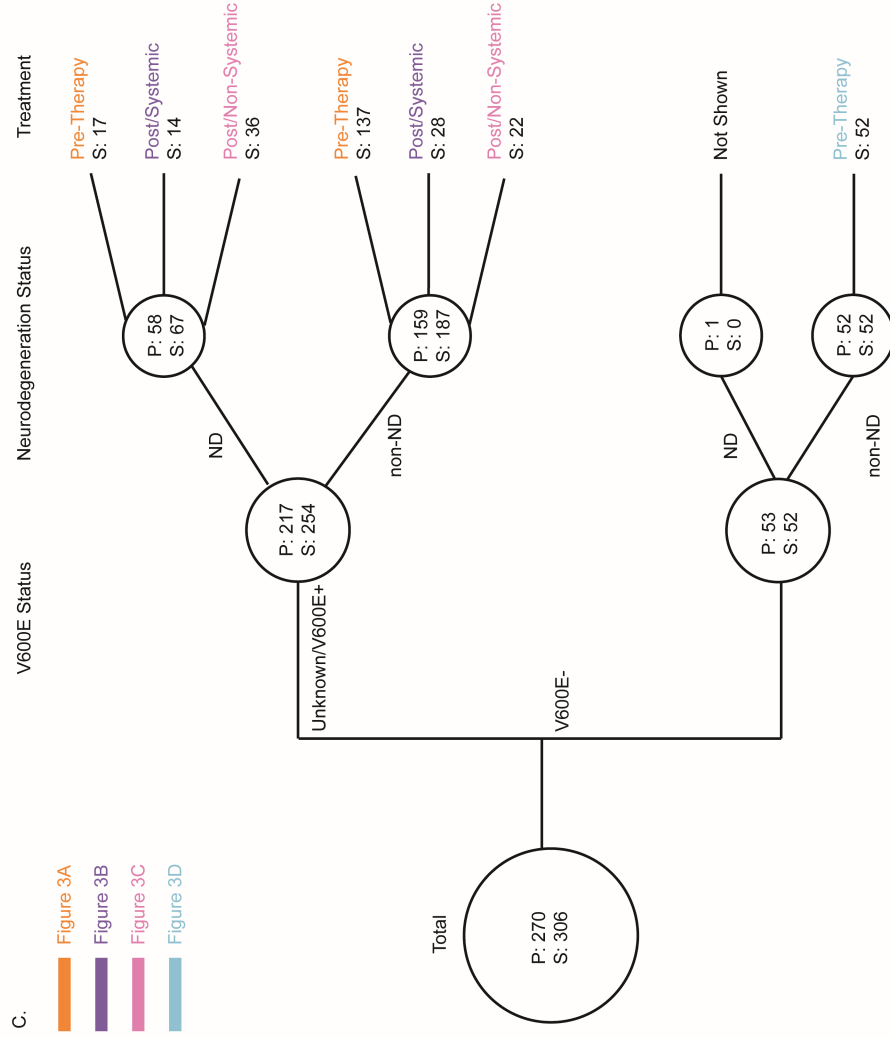

- Figure 3A
- Figure 3B
- Figure 3C
- Figure 3D

Patient/Sample Breakdown

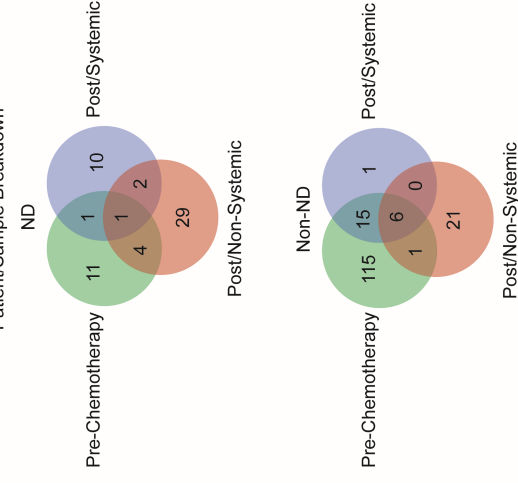





Supplemental Figure 2.

I. LCH0041 (Non-Risk, Multiple Lesion, Multisystem)

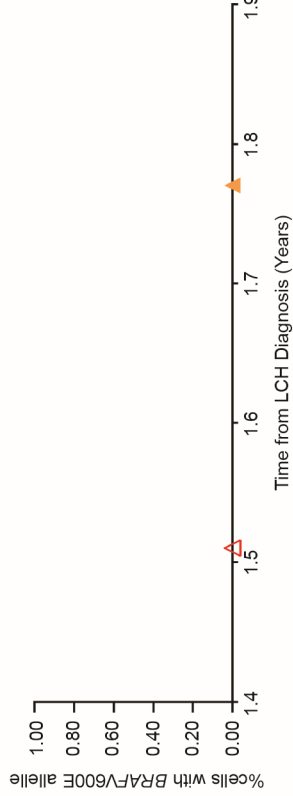

J. LCH0044 (Non-Risk, Multiple Lesion, Multisystem)

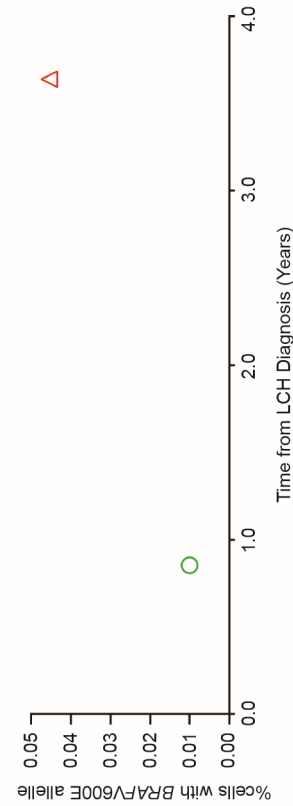

K. LCH0045 (Non-Risk, Multiple Lesion, Multisystem)

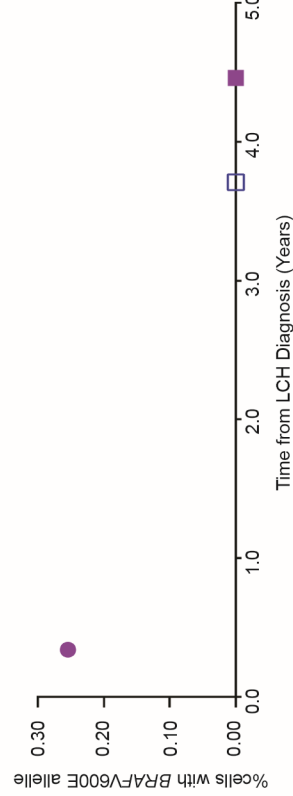

L. LCH0052 (Non-Risk, Multiple Lesion, Multisystem)

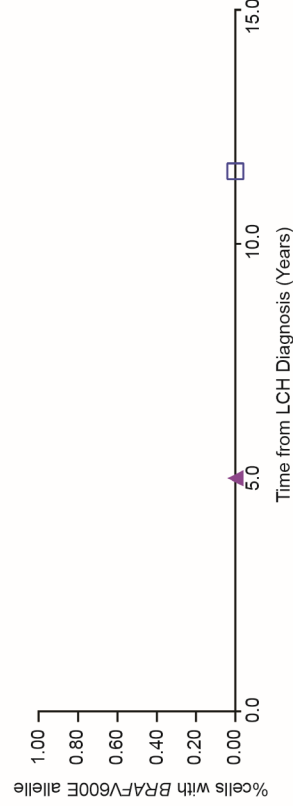

M. LCH0057 (Non-Risk, Multiple Lesion, Multisystem)

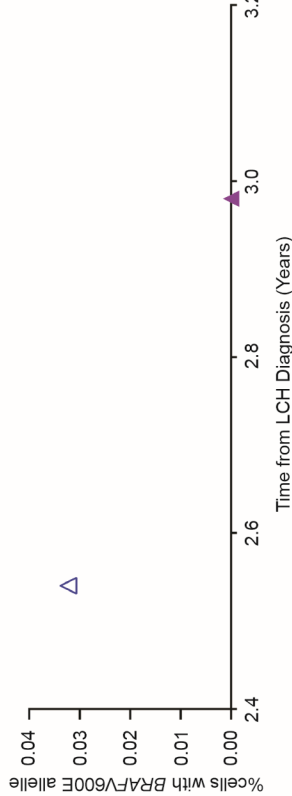

N. LCH0059 (Non-Risk, Multiple Lesion, Single System)

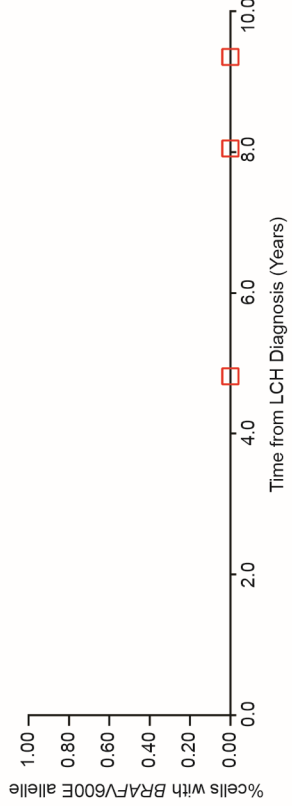

O. LCH0061 (Non-Risk, Multiple Lesion, Single System)

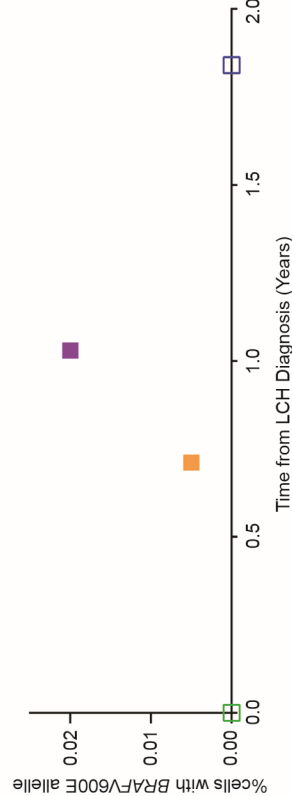

P. LCH0062 (Non-Risk, Single Lesion, Single System)

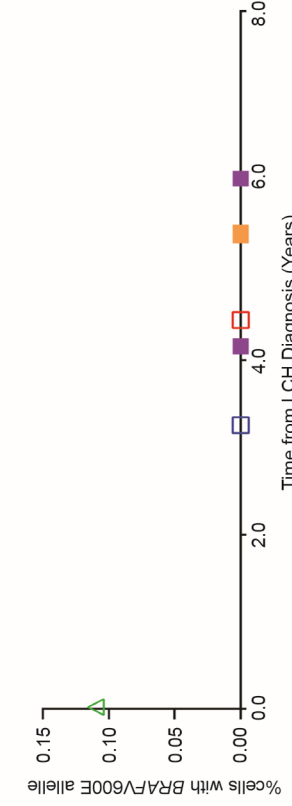

Timing of Sample

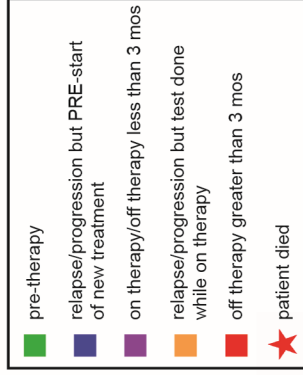

Type of Treatment

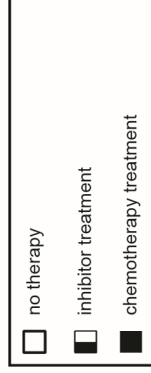

Status of LCH ND

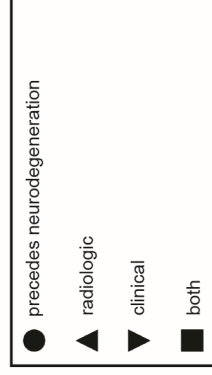

Supplement: NIHMS997726-supplement-Supplemental.pdf [file NIHMS997726-supplement-Supplemental.pdf]
